# 1 **Formation of oxidized gases and secondary organic aerosol from a** 2 **commercial oxidant-generating electronic air cleaner**

3 Taekyu Joo<sup>a</sup>, Jean C. Rivera-Rios<sup>b</sup>, Daniel Alvarado-Velez<sup>b</sup>, Sabrina Westgate<sup>b</sup>, Nga Lee Ng<sup>a,b,c</sup>

4 *<sup>a</sup>School of Earth and Atmospheric Sciences, Georgia Institute of Technology, Atlanta, Georgia*  
5 *30332, United States*

6 *<sup>b</sup>School of Chemical and Biomolecular Engineering, Georgia Institute of Technology, Atlanta,*  
7 *Georgia 30332, United States*

8 *<sup>c</sup>School of Civil and Environmental Engineering, Georgia Institute of Technology, Atlanta,*  
9 *Georgia 30332, United States*

10

## 11 **Abstract**

12 Airborne virus transmission during the COVID-19 pandemic increased the demand for indoor  
13 air cleaners. While some commercial electronic air cleaners could be effective in reducing primary  
14 pollutants and inactivating bioaerosol, studies on the formation of secondary products from  
15 oxidation chemistry during their use are limited. Here, we measured oxygenated volatile organic  
16 compounds (OVOCs) and the chemical composition of particles generated from a hydroxyl radical  
17 generator in an office. During operation, enhancements in OVOCs, especially low-molecular-  
18 weight organic and inorganic acids, were detected. Rapid increases in particle number and volume  
19 concentrations were observed, corresponding to the formation of highly-oxidized secondary  
20 organic aerosol (SOA) (O:C ~1.3). The organic mass spectra showed an enhanced signal at  $m/z$  44  
21 ( $\text{CO}_2^+$ ) and the aerosol evolved with a slope of  $\sim -1$  in the Van Krevelen diagram. These results  
22 suggest that organic acids generated during VOC oxidation contributed to particle nucleation and  
23 SOA formation. Nitrate, sulfate, and chloride also increased during the oxidation without a

24 corresponding increase in ammonium, suggesting organic nitrate, organic sulfate, and organic  
25 chloride formation. As secondary species are reported to have detrimental health effects, further  
26 studies are needed to evaluate potential OVOCs and SOA formation from electronic air cleaners  
27 in different indoor environments.

28

29 Keywords: hydroxyl generator, air purifier, air cleaning, indoor air, oxidation, organic aerosol,  
30 volatile organic compounds

31

32 Synopsis: We observed formation of oxygenated volatile organic compounds and secondary  
33 organic aerosol from an electronic air cleaner.

34

## 35 Introduction

36 People spend most of their time indoors, making the air quality in these spaces an important  
37 factor for human health. Indoor air quality (IAQ) depends on several factors, including but not  
38 limited to: exchange with outdoor air, filtration, emissions from indoor sources, chemical reactions  
39 i.e., via oxidation or multi-phase processes, and deposition onto surfaces.<sup>1</sup> Due to the impact of  
40 IAQ on health, there is a growing demand for air cleaning technologies meant to reduce exposure  
41 to potentially detrimental substances indoors. This demand has increased considerably during the  
42 course of the recent COVID-19 (severe acute respiratory syndrome coronavirus 2, SARS-CoV-2)  
43 pandemic due to the increased recognition of the role of airborne virus transmission, especially  
44 indoors.<sup>2-6</sup>

45 Air cleaners are usually deployed with the intention to remove indoor pollutants such as  
46 particles or volatile organic compounds (VOCs), as well as to inactivate pathogens. Two types of

47 air cleaning technologies are commonly used to remove particles: mechanical filtration and  
48 electronic air cleaners (e.g., ionizers and electrostatic precipitators). Gaseous pollutants such as  
49 odors and VOCs can be removed via a number of different technologies: adsorbent media air filters  
50 (e.g., activated carbon) and various electronic air cleaning devices such as photocatalytic oxidation  
51 (PCO), plasma, and ozone-generating equipment among others.<sup>7-9</sup> In addition, hydroxyl radical  
52 (OH) generation via photolysis of ozone or water is also used to destroy odors and VOCs, usually  
53 as a substitute for ozone-generating air cleaners.<sup>10, 11</sup> Among these cleaning technologies,  
54 ultraviolet germicidal irradiation (UVGI), ionizers, ozone oxidations, and PCO purifiers have been  
55 shown to be capable of inactivating viruses, bacteria, and other bioaerosol.<sup>6, 8, 9, 12-19</sup>

56 There are increasing concerns regarding the use of electronic air cleaners as these devices can  
57 potentially generate unintended byproducts via oxidation chemistry similar to that in the  
58 atmosphere.<sup>20, 21</sup> The oxidation mechanism of VOCs in the atmosphere can be simplified as the  
59 following: (1) initial attack of the VOCs by oxidants (OH, O<sub>3</sub>, and NO<sub>3</sub>), (2) organic peroxy radical  
60 reactions, and in some cases (3) alkoxy radical reactions.<sup>22, 23</sup> Organic peroxy radicals can react  
61 with other species in the atmosphere (e.g., NO, NO<sub>2</sub>, HO<sub>2</sub>, etc.) and undergo functionalization or  
62 form alkoxy radicals. Alkoxy radicals can fragment and form smaller organic compounds in the  
63 atmosphere that can be oxidized further. Fragmentation leads to increased volatility whereas  
64 functionalization decreases volatility and increases solubility.<sup>22</sup> These complex, multi-generational,  
65 gas-phase oxidation processes result in the formation of a large variety of organic compounds,  
66 which can undergo gas-particle partitioning and/or nucleation to form secondary organic aerosol  
67 (SOA). While some byproducts of VOC oxidation can have adverse health effects,<sup>24-29</sup> systematic  
68 investigations of potential formation of organic gases and aerosol during the operation of  
69 oxidant/ion-generating air cleaners indoors are scarce. Previous studies are limited to investigating

70 the formation of ozone, NO<sub>x</sub>, CO, CO<sub>2</sub>, less-oxidized VOCs, or particle number and mass  
71 concentrations, but not on the composition of more-oxidized VOCs or aerosol.<sup>8,9,30</sup>

72 In this work, we evaluated the effect of a commercial electronic air cleaner (hydroxyl radical  
73 generator) operated inside an office. We monitored gas-phase oxidized products and PM<sub>1</sub>  
74 (particulate matter less than 1 μm in diameter) size distribution and composition. We show that  
75 the operation of this device leads to the formation of small organic acids and increases PM<sub>1</sub> number  
76 and mass concentrations. These results show that care must be taken when choosing an adequate  
77 and appropriate air cleaning technology for a particular environment and task.

78

## 79 Materials and methods

80 The experiment was performed in an office (~ 16 m<sup>2</sup>) in the Ford Environmental Sciences and  
81 Technology Building at the Georgia Institute of Technology. We performed the experiment in the  
82 following sequence: 1) 2.33 hours of office background sampling, 2) 1.5 hours of hydroxyl  
83 generator operation (Titan Model #4000, International Ozone Technologies Group, Inc., Delray  
84 Beach, FL), and 3) 1.5 hours of sampling after the device was turned off. Briefly, the device  
85 generates OH radical and hydrogen peroxide (H<sub>2</sub>O<sub>2</sub>) via photocatalytic reaction of TiO<sub>2</sub> with UV-  
86 A range (365 - 385 nm) light and H<sub>2</sub>O and O<sub>2</sub> in the air.<sup>31,32</sup> Many other brands of hydroxyl  
87 generator are available in the market and employ a similar technology.

88 Gas-phase organic compounds were measured and reported as counts per second using a high-  
89 resolution time-of-flight chemical ionization mass spectrometer (HR-ToF-CIMS, Aerodyne  
90 Research Inc., Billerica, MA) with iodide (I<sup>-</sup>) as a reagent ion, which selectively measures  
91 oxygenated organics.<sup>33</sup> O<sub>3</sub> and NO<sub>x</sub> were monitored using an O<sub>3</sub> Analyzer (T400, Teledyne, City

92 of Industry, CA), a NO-NO<sub>2</sub>-NO<sub>x</sub> Analyzer (42C, Thermo Fisher Scientific, Waltham, MA), and  
93 a Cavity Attenuated Phase Shift NO<sub>2</sub> monitor (CAPS, Aerodyne Inc.).

94 Size-resolved PM<sub>1</sub> number and volume concentrations were measured using a scanning  
95 mobility particle sizer (SMPS). The SMPS is a combination of a differential mobility analyzer  
96 (DMA) (TSI 3040, TSI Inc., Shoreview, MN) and a condensation particle counter (CPC) (TSI  
97 3775). In addition, we deployed a separate CPC (TSI 3025 A) to monitor the total number  
98 concentration of particles (all particles under roughly 3 μm). Aerosol chemical composition was  
99 monitored using a high-resolution time-of-flight aerosol mass spectrometer (HR-ToF-AMS,  
100 Aerodyne Research Inc.). HR-ToF-AMS quantifies organics, nitrate, sulfate, ammonium, and  
101 chloride mass concentrations and measures the bulk elemental composition of the particles (e.g.,  
102 O:C and H:C ratios).<sup>34, 35</sup> The elemental ratios for particles were calculated based on the  
103 “Improved-Ambient” method.<sup>35</sup>

104

## 105 Results

106 **Formation of oxidized VOCs (OVOCs).** The immediate formation of oxygenated products  
107 was observed by the HR-ToF-CIMS (Figure 1) when the device was turned on. Formic acid (*m/z*  
108 173, CH<sub>2</sub>O<sub>2</sub>I<sup>-</sup>), acetic acid (*m/z* 187, C<sub>2</sub>H<sub>4</sub>O<sub>2</sub>I<sup>-</sup>), iminoacetic acid (*m/z* 200, C<sub>2</sub>H<sub>3</sub>NO<sub>2</sub>I<sup>-</sup>), oxamide  
109 (*m/z* 215, C<sub>2</sub>H<sub>4</sub>N<sub>2</sub>O<sub>2</sub>I<sup>-</sup>), glyceraldehyde (*m/z* 217, C<sub>3</sub>H<sub>6</sub>O<sub>3</sub>I<sup>-</sup>), glycerol (*m/z* 219, C<sub>3</sub>H<sub>8</sub>O<sub>3</sub>I<sup>-</sup>), alanine  
110 (*m/z* 216, C<sub>3</sub>H<sub>7</sub>NO<sub>2</sub>I<sup>-</sup>), and acetoacetic acid (*m/z* 229, C<sub>4</sub>H<sub>6</sub>O<sub>3</sub>I<sup>-</sup>) are identified and showed the most  
111 obvious enhancements during the operation period. Enhanced glyceraldehyde and glycerol at the  
112 beginning of the experiment (12:10 pm) was likely due to the presence of people in the office  
113 initially (to set up instruments for this study), as these compounds are formed as intermediates in  
114 metabolism and widely used in cosmetics or as an additive in foods.<sup>36-38</sup> Nitrous acid (*m/z* 174,

115 HONO( $\text{I}^-$ ), which is an inorganic acid, also increased during the operation. Hydrogen peroxide ( $m/z$   
116 161,  $\text{H}_2\text{O}_2\text{I}^-$ ) increased during the background period and decreased during the operation of device.  
117 As mentioned in the previous section,  $\text{TiO}_2$  photocatalytic technology is reported to produce  $\text{H}_2\text{O}_2$   
118 as another product.<sup>31</sup> However,  $\text{H}_2\text{O}_2$  decreased when the device was turned on and rebounded  
119 after the device was turned off. The pre-existing  $\text{H}_2\text{O}_2$  in the office could have been interacting  
120 with the generated OH radical but flattened as a result of regeneration via self-reaction of  
121 hydroperoxyl radical.

122 **Formation of secondary organic aerosol.** Particle number and volume concentrations started  
123 increasing once the device was in operation (Figure 2a). Both the number and volume  
124 concentrations increased rapidly in the first 30 minutes after the device was turned on and slowed  
125 down after reaching  $\sim 4000$  particle  $\text{cm}^{-3}$  and  $\sim 5 \mu\text{m}^3 \text{cm}^{-3}$ , respectively. This was followed by a  
126 rapid decrease in concentrations after the device was turned off. The increase in particles was  
127 mostly within the  $\text{PM}_{10}$  size range based on the agreement between the SMPS ( $\text{PM}_{10}$  only) and the  
128 CPC (all particles under roughly  $3 \mu\text{m}$ ). During the operation, an enhancement was observed in  
129 the 100 - 200 nm size range for both particle number and volume concentrations (Figure S1). It is  
130 noted that a similar experiment was performed in a laboratory space ( $\sim 140 \text{m}^2$ ) and similar results  
131 were observed (Figure S2).

132 The time series of the species measured by the HR-ToF-AMS are shown in Figure 2b. A  
133 collection efficiency of 0.45 was applied to the data as the inorganic concentrations were low and  
134 the aerosol did not contain high mass fractions of acidic sulfate or ammonium nitrate.<sup>39</sup> The  
135 chemical composition of the particles during the operation period confirmed SOA formation, with  
136 organics reaching  $2.1 \mu\text{g m}^{-3}$  after the device was turned on. Figure 2 also shows that the mass  
137 concentrations of non-refractory species reported by the HR-ToF-AMS were somewhat lower than

138 the volume concentration enhancement measured by the SMPS (converted to mass concentration  
139 by the density of each species, Figure S3). This difference was expected since both instruments  
140 sampled particles without the use of a dryer at the instrument inlets. Thus, the particle  
141 concentration reported by the SMPS included water whereas particle water can be evaporated in  
142 the low-pressure aerodynamic lens and vacuum system of HR-ToF-AMS.<sup>39-42</sup> The discrepancy  
143 diminishes when accounting for particle water as shown in Figure S3. Ammonium concentration  
144 was low throughout the experiment and showed little changes whereas nitrate, sulfate, and chloride  
145 increased during the device operation period. Since we did not observe ammonium increasing  
146 along with nitrate, sulfate, or chloride, these species are likely in the form of organic nitrate,  
147 organic sulfate, and organic chloride. Organic mass spectra comparison shows enhanced fraction  
148 at  $m/z$  44 ( $\text{CO}_2^+$ ) during the device operation (Figures 3a and S4), with increased O:C and  
149 decreased H:C (Figure S5a). The increase in the degree of oxidation of aerosol is further illustrated  
150 in the Van Krevelen diagram in Figure 3b.<sup>43-45</sup> The aerosol evolution followed a slope of  $\sim -1$ , with  
151 particle carbon oxidation state ( $\text{OS}_c = 2 \text{ O:C} - \text{H:C}$ ) increasing during device operation, as a result  
152 of enhancements in O:C and reductions in H:C.<sup>46</sup>

153

## 154 Discussion

155 Generation of hydroxyl radicals indoors reduces VOC concentrations in a similar manner to  
156 tropospheric VOC oxidation chemistry, which proceeds through complex, multi-generational  
157 chemistry and results in the formation of a large number of organic products. The byproducts  
158 formed from these reactions in this study depend on the identity of the VOCs in the office. VOCs  
159 were not measured in this work, however, Price et al.<sup>47</sup> speciated total organic carbon (in both gas  
160 and particle phases) in an art museum and identified that over 80% of the carbon present are highly

161 reduced ( $OSc < -0.5$ ) and volatile compounds with low carbon number ( $< C_6$ ). It is possible that  
162 the office has a similar VOC speciation, though it could have a lower total carbon budget due to  
163 no occupancy and no activities, such as printing,<sup>48</sup> which can lead to VOC emissions. The observed  
164 oxygenated  $C_1$ - $C_4$  compounds can be formed from functionalization and fragmentation of such  
165 VOCs during the oxidation.<sup>22</sup> Although we only observed small carboxylic acids in the gas phase,  
166 this does not exclude the formation of larger OVOCs, which might not be detected by I-CIMS, be  
167 lost in the instrument inlet line, interact with the surfaces,<sup>1, 47</sup> or have participated in new particle  
168 formation and growth.<sup>49</sup> Increasing particle number and mass concentrations and the formation of  
169 highly-oxidized SOA suggest that new particle formation and condensation growth can be a loss  
170 process of larger, less-volatile OVOCs. The SOA formed has an O:C of  $\sim 1.3$ , which is higher than  
171 the typical O:C range observed for more-oxidized oxygenated organic aerosol (MO-OOA) in  
172 ambient environments.<sup>44, 50</sup> While both nucleation and gas-particle partitioning can lead to SOA  
173 formation, nucleation is likely the main process as particle elemental composition changed (O:C  
174 decreased and H:C increased) as soon as the device was turned off. The prevalence of nucleation  
175 is likely due to the small condensation sink with low aerosol background ( $\sim 581 \text{ \# cm}^{-3}$ ) in the  
176 office. The enhancement of  $m/z$  44 ( $CO_2^+$ ) in the HR-ToF-AMS organic mass spectra indicates the  
177 contribution of organic acids in SOA formation, as their thermal decarboxylation gives rise to the  
178  $CO_2^+$  fragment.<sup>44, 51-54</sup> In the Van Krevelen diagram, the SOA evolved along the  $\sim -1$  line, which  
179 corresponds to the addition of carboxylic acids and/or simultaneous increases in alcohol and  
180 carbonyl groups.<sup>43, 44</sup> Taken together, these results show that carboxylic acids were formed during  
181 the oxidation process and contributed to new particle formation owing to their low volatility.<sup>22, 49,</sup>

182 <sup>55</sup>



183 Nitrate, sulfate, and chloride enhancements are expected to be associated with organic nitrate,  
184 organic sulfate, and organic chloride formation (Figure S5). The average  $\text{NO}^+/\text{NO}_2^+$  ion ratio from  
185 the HR-ToF-AMS is widely used as an indicator to differentiate inorganic vs. organic nitrate.<sup>56-58</sup>  
186 The  $\text{NO}^+/\text{NO}_2^+$  ratio for inorganic nitrate during the instrument calibration was 1.98, and previous  
187 laboratory studies have shown that this ratio is much higher for organic nitrate than inorganic  
188 nitrate.<sup>56, 59-61</sup> The average  $\text{NO}^+/\text{NO}_2^+$  ratio during the operation period was  $\sim 17$ , implying that  
189 virtually all the particle-phase nitrate was organic nitrate. The contribution of organic sulfate can  
190 be examined by evaluating the fractions of  $\text{HSO}_3^+$  and  $\text{H}_2\text{SO}_4^+$  in  $\text{H}_x\text{SO}_y^+$  fragments ( $\text{SO}^+$ ,  $\text{SO}_2^+$ ,  
191  $\text{SO}_3^+$ ,  $\text{HSO}_3^+$ , and  $\text{H}_2\text{SO}_4^+$ ).<sup>62</sup> Both fractions decreased when the device was turned on, implying  
192 the presence of organic sulfate. Organic chloride formation can be associated with chlorine-  
193 containing VOCs which may be emitted or formed through interactions with cleaning products.<sup>63,</sup>  
194 <sup>64</sup>

195 To our knowledge, this is the first study that monitored the chemical composition of secondary  
196 products in both gas and particle phases during the operation of an electronic air cleaner that  
197 dissipates oxidants in a real-world setting. Although we lack parent VOC measurements, the  
198 limited number of OVOCs and small enhancement in SOA observed during this work were  
199 assumed to be due to low initial VOCs concentrations in the office where this study was conducted.  
200 Much larger enhancements in OVOCs and SOA could be observed in other types of indoor  
201 environments such as industrial settings, homes, and restaurants, which can have much larger VOC  
202 concentrations, even more than in outdoor locations.<sup>1, 47, 64-66</sup> Secondary VOC oxidation products  
203 have been shown to have detrimental effects on human health.<sup>24, 26, 27, 67, 68</sup> Specifically, SOA has  
204 been reported to induce cellular reactive oxygen species (ROS) generation, inflammatory cytokine  
205 production, and oxidative modification of RNA.<sup>69-71</sup> The toxicity of SOA could increase with

206 increasing OSC.<sup>28, 72</sup> Therefore, future studies on air cleaning technologies should not be limited to  
207 the inactivation of bioaerosol or reduction of particular VOCs, but should also evaluate potential  
208 OVOCs and SOA formation during their operation. The electronic air cleaner tested in this study  
209 is similar to many other commercially available devices and similar experiments should be  
210 conducted with other devices.

211

## 212 Conflicts of interest

213 The authors declare no competing financial interest.

214

## 215 Acknowledgements

216 The authors would like to thank C. Peng, A. P. Mouat, and J. Kaiser for helpful discussions on the  
217 experimental setup and J. Lee for help in the table of content (TOC) figure illustration. The HR-  
218 ToF-CIMS was purchased through NSF Major Research Instrumentation (MRI) grant 1428738.

## 219 References

- 220 1. Abbatt, J. P. D.; Wang, C., The atmospheric chemistry of indoor environments.  
221 *Environmental Science: Processes & Impacts* **2020**, 22 (1), 25-48.
- 222 2. CDC Scientific Brief: SARS-CoV-2 and Potential Airborne Transmission.  
223 <https://www.cdc.gov/coronavirus/2019-ncov/more/scientific-brief-sars-cov-2.html> (accessed Oct,  
224 5).
- 225 3. Lednicky, J. A.; Lauzardo, M.; Hugh Fan, Z.; Jutla, A.; Tilly, T. B.; Gangwar, M.;  
226 Usmani, M.; Shankar, S. N.; Mohamed, K.; Eiguren-Fernandez, A., et al., Viable SARS-CoV-2  
227 in the air of a hospital room with COVID-19 patients. *International Journal of Infectious Diseases*  
228 **2020**.
- 229 4. Morawska, L.; Milton, D. K., It Is Time to Address Airborne Transmission of Coronavirus  
230 Disease 2019 (COVID-19). *Clinical Infectious Diseases* **2020**, 71 (9), 2311-2313.
- 231 5. Prather, K. A.; Wang, C. C.; Schooley, R. T., Reducing transmission of SARS-CoV-2.  
232 *Science* **2020**, eabc6197.
- 233 6. Agarwal, N.; Meena, C. S.; Raj, B. P.; Saini, L.; Kumar, A.; Gopalakrishnan, N.; Kumar,  
234 A.; Balam, N. B.; Alam, T.; Kapoor, N. R., et al., Indoor air quality improvement in COVID-19  
235 pandemic: Review. *Sustainable Cities and Society* **2021**, 70, 102942.
- 236 7. ASHRAE, ASHRAE Standard 52.2-2017 Method of testing general ventilation air-  
237 cleaning devices for removal efficiency by particle size. **2017**.
- 238 8. EPA, U., Residential Air Cleaners: A Technical Summary. 3rd Edition ed.; Agency, U. S.  
239 E. P., Ed. US EPA: 2018.
- 240 9. Zhang, Y.; Mo, J.; Li, Y.; Sundell, J.; Wargocki, P.; Zhang, J.; Little, J. C.; Corsi, R.;  
241 Deng, Q.; Leung, M. H. K., et al., Can commonly-used fan-driven air cleaning technologies  
242 improve indoor air quality? A literature review. *Atmospheric Environment* **2011**, 45 (26), 4329-  
243 4343.
- 244 10. Johnson, M. S.; Nilsson, E. J. K.; Svensson, E. A.; Langer, S., Gas-Phase Advanced  
245 Oxidation for Effective, Efficient in Situ Control of Pollution. *Environmental Science &*  
246 *Technology* **2014**, 48 (15), 8768-8776.
- 247 11. Crosley, D. R.; Araps, C. J.; Doyle-Eisele, M.; McDonald, J. D., Gas-phase photolytic  
248 production of hydroxyl radicals in an ultraviolet purifier for air and surfaces. *Journal of the Air &*  
249 *Waste Management Association* **2017**, 67 (2), 231-240.
- 250 12. Sunada, K.; Kikuchi, Y.; Hashimoto, K.; Fujishima, A., Bactericidal and Detoxification  
251 Effects of TiO<sub>2</sub> Thin Film Photocatalysts. *Environmental Science & Technology* **1998**, 32 (5),  
252 726-728.
- 253 13. Grinshpun, S. A.; Adhikari, A.; Honda, T.; Kim, K. Y.; Toivola, M.; Ramchander Rao,  
254 K. S.; Reponen, T., Control of Aerosol Contaminants in Indoor Air: Combining the Particle  
255 Concentration Reduction with Microbial Inactivation. *Environmental Science & Technology* **2007**,  
256 41 (2), 606-612.
- 257 14. Hyun, J.; Lee, S.-G.; Hwang, J., Application of corona discharge-generated air ions for  
258 filtration of aerosolized virus and inactivation of filtered virus. *Journal of Aerosol Science* **2017**,  
259 107, 31-40.
- 260 15. Nunayon, S. S.; Zhang, H. H.; Jin, X.; Lai, A. C. K., Experimental evaluation of positive  
261 and negative air ions disinfection efficacy under different ventilation duct conditions. *Building and*  
262 *Environment* **2019**, 158, 295-301.

- 263 16. Riaz, N.; Khan, M. S.; Bilal, M.; Ullah, S.; Al-Sehemi, A. G., Photocatalytic Inactivation  
264 of Bioaerosols: A Short Review on Emerging Technologies. *Current Analytical Chemistry* **2021**,  
265 *17* (1), 31-37.
- 266 17. Bono, N.; Ponti, F.; Punta, C.; Candiani, G., Effect of UV Irradiation and TiO<sub>2</sub>-  
267 Photocatalysis on Airborne Bacteria and Viruses: An Overview. *Materials* **2021**, *14* (5), 1075.
- 268 18. Luo, H.; Zhong, L., Ultraviolet germicidal irradiation (UVGI) for in-duct airborne  
269 bioaerosol disinfection: Review and analysis of design factors. *Building and Environment* **2021**,  
270 *197*, 107852.
- 271 19. Park, J.-S.; Sung, B.-J.; Yoon, K.-S.; Jeong, C.-S., The bactericidal effect of an ionizer  
272 under low concentration of ozone. *BMC Microbiol* **2016**, *16* (1), 173-173.
- 273 20. Weber, L.; Jewett, C., Schools spending millions on air purifiers often sold using  
274 overblown claims. Kaiser Health News: [https://www.cnn.com/2021/05/03/health/air-filter-covid-  
275 scams-khn/index.html](https://www.cnn.com/2021/05/03/health/air-filter-covid-scams-khn/index.html), 2021.
- 276 21. Zaatari, M.; Harmon, M., Open Letter to address the use of Electronic Air Cleaning  
277 Equipment in Buildings. Medium: [https://medium.com/open-letter-to-address-the-use-of-  
278 electronic-air/no-to-ionizers-plasma-uvpco-bc1570b2fb9b](https://medium.com/open-letter-to-address-the-use-of-electronic-air/no-to-ionizers-plasma-uvpco-bc1570b2fb9b), 2021.
- 279 22. Kroll, J. H.; Seinfeld, J. H., Chemistry of secondary organic aerosol: Formation and  
280 evolution of low-volatility organics in the atmosphere. *Atmospheric Environment* **2008**, *42* (16),  
281 3593-3624.
- 282 23. Seinfeld, J. H.; Pandis, S. N., *Atmospheric chemistry and physics: from air pollution to  
283 climate change*. John Wiley & Sons: 2016.
- 284 24. O'Brien, P. J.; Siraki, A. G.; Shangari, N., Aldehyde Sources, Metabolism, Molecular  
285 Toxicity Mechanisms, and Possible Effects on Human Health. *Critical Reviews in Toxicology*  
286 **2005**, *35* (7), 609-662.
- 287 25. Murray, C. J. L.; Aravkin, A. Y.; Zheng, P.; Abbafati, C.; Abbas, K. M.; Abbasi-  
288 Kangevari, M.; Abd-Allah, F.; Abdelalim, A.; Abdollahi, M.; Abdollahpour, I., et al., Global  
289 burden of 87 risk factors in 204 countries and territories, 1990-2019: a systematic analysis for the  
290 Global Burden of Disease Study 2019. *The Lancet* **2020**, *396* (10258), 1223-1249.
- 291 26. Hoek, G.; Krishnan, R. M.; Beelen, R.; Peters, A.; Ostro, B.; Brunekreef, B.; Kaufman,  
292 J. D., Long-term air pollution exposure and cardio- respiratory mortality: a review. *Environmental  
293 Health* **2013**, *12* (1), 43.
- 294 27. Pope, C. A.; Dockery, D. W., Health Effects of Fine Particulate Air Pollution: Lines that  
295 Connect. *Journal of the Air & Waste Management Association* **2006**, *56* (6), 709-742.
- 296 28. Tuet, W. Y.; Chen, Y.; Fok, S.; Champion, J. A.; Ng, N. L., Inflammatory responses to  
297 secondary organic aerosols (SOA) generated from biogenic and anthropogenic precursors. *Atmos.  
298 Chem. Phys.* **2017**, *17* (18), 11423-11440.
- 299 29. Liu, F.; Saavedra, M. G.; Champion, J. A.; Griendling, K. K.; Ng, N. L., Prominent  
300 Contribution of Hydrogen Peroxide to Intracellular Reactive Oxygen Species Generated upon  
301 Exposure to Naphthalene Secondary Organic Aerosols. *Environmental Science & Technology  
302 Letters* **2020**, *7* (3), 171-177.
- 303 30. Zeng, Y.; Manwatkar, P.; Laguerre, A.; Beke, M.; Kang, I.; Ali, A. S.; Farmer, D. K.;  
304 Gall, E. T.; Heidarinejad, M.; Stephens, B., Evaluating a commercially available in-duct bipolar  
305 ionization device for pollutant removal and potential byproduct formation. *Building and  
306 Environment* **2021**, *195*, 107750.

307 31. Schneider, J.; Matsuoka, M.; Takeuchi, M.; Zhang, J.; Horiuchi, Y.; Anpo, M.;  
308 Bahnemann, D. W., Understanding TiO<sub>2</sub> Photocatalysis: Mechanisms and Materials. *Chemical*  
309 *Reviews* **2014**, *114* (19), 9919-9986.

310 32. IOTG, Titan 4000 Brochures. Group, I. O. T., Ed. International Ozone Technologies Group:  
311 <http://internationalozone.com/Sources.html>, 2020.

312 33. Aljawhary, D.; Lee, A. K. Y.; Abbatt, J. P. D., High-resolution chemical ionization mass  
313 spectrometry (ToF-CIMS): application to study SOA composition and processing. *Atmos. Meas.*  
314 *Tech.* **2013**, *6* (11), 3211-3224.

315 34. DeCarlo, P. F.; Kimmel, J. R.; Trimborn, A.; Northway, M. J.; Jayne, J. T.; Aiken, A.  
316 C.; Gonin, M.; Fuhrer, K.; Horvath, T.; Docherty, K. S., et al., Field-Deployable, High-  
317 Resolution, Time-of-Flight Aerosol Mass Spectrometer. *Analytical Chemistry* **2006**, *78* (24),  
318 8281-8289.

319 35. Canagaratna, M. R.; Jimenez, J. L.; Kroll, J. H.; Chen, Q.; Kessler, S. H.; Massoli, P.;  
320 Hildebrandt Ruiz, L.; Fortner, E.; Williams, L. R.; Wilson, K. R., et al., Elemental ratio  
321 measurements of organic compounds using aerosol mass spectrometry: characterization, improved  
322 calibration, and implications. *Atmos. Chem. Phys.* **2015**, *15* (1), 253-272.

323 36. Bagnato, G.; Iulianelli, A.; Sanna, A.; Basile, A., Glycerol Production and Transformation:  
324 A Critical Review with Particular Emphasis on Glycerol Reforming Reaction for Producing  
325 Hydrogen in Conventional and Membrane Reactors. *Membranes (Basel)* **2017**, *7* (2), 17.

326 37. Clough, S. R., Glyceraldehyde. In *Encyclopedia of Toxicology (Third Edition)*, Wexler, P.,  
327 Ed. Academic Press: Oxford, 2014; pp 752-753.

328 38. Wernke, M. J., Glycerol. In *Encyclopedia of Toxicology (Third Edition)*, Wexler, P., Ed.  
329 Academic Press: Oxford, 2014; pp 754-756.

330 39. Middlebrook, A. M.; Bahreini, R.; Jimenez, J. L.; Canagaratna, M. R., Evaluation of  
331 Composition-Dependent Collection Efficiencies for the Aerodyne Aerosol Mass Spectrometer  
332 using Field Data. *Aerosol Science and Technology* **2012**, *46* (3), 258-271.

333 40. Murphy, D. M., The design of single particle laser mass spectrometers. *Mass Spectrometry*  
334 *Reviews* **2007**, *26* (2), 150-165.

335 41. Zelenyuk, A.; Imre, D.; Cuadra-Rodriguez, L. A., Evaporation of Water from Particles in  
336 the Aerodynamic Lens Inlet: An Experimental Study. *Analytical Chemistry* **2006**, *78* (19), 6942-  
337 6947.

338 42. Engelhart, G. J.; Hildebrandt, L.; Kostenidou, E.; Mihalopoulos, N.; Donahue, N. M.;  
339 Pandis, S. N., Water content of aged aerosol. *Atmos. Chem. Phys.* **2011**, *11* (3), 911-920.

340 43. Heald, C. L.; Kroll, J. H.; Jimenez, J. L.; Docherty, K. S.; DeCarlo, P. F.; Aiken, A. C.;  
341 Chen, Q.; Martin, S. T.; Farmer, D. K.; Artaxo, P., A simplified description of the evolution of  
342 organic aerosol composition in the atmosphere. *Geophysical Research Letters* **2010**, *37* (8).

343 44. Ng, N. L.; Canagaratna, M. R.; Jimenez, J. L.; Chhabra, P. S.; Seinfeld, J. H.; Worsnop,  
344 D. R., Changes in organic aerosol composition with aging inferred from aerosol mass spectra.  
345 *Atmos. Chem. Phys.* **2011**, *11* (13), 6465-6474.

346 45. Van Krevelen, D., Graphical-statistical method for the study of structure and reaction  
347 processes of coal. *Fuel* **1950**, *29*, 269-284.

348 46. Kroll, J. H.; Donahue, N. M.; Jimenez, J. L.; Kessler, S. H.; Canagaratna, M. R.; Wilson,  
349 K. R.; Altieri, K. E.; Mazzoleni, L. R.; Wozniak, A. S.; Bluhm, H., et al., Carbon oxidation state  
350 as a metric for describing the chemistry of atmospheric organic aerosol. *Nature Chemistry* **2011**,  
351 *3* (2), 133-139.

352 47. Price, D. J.; Day, D. A.; Pagonis, D.; Stark, H.; Algrim, L. B.; Handschy, A. V.; Liu,  
353 S.; Krechmer, J. E.; Miller, S. L.; Hunter, J. F., et al., Budgets of Organic Carbon Composition  
354 and Oxidation in Indoor Air. *Environmental Science & Technology* **2019**, *53* (22), 13053-13063.  
355 48. Destailhats, H.; Maddalena, R. L.; Singer, B. C.; Hodgson, A. T.; McKone, T. E., Indoor  
356 pollutants emitted by office equipment: A review of reported data and information needs.  
357 *Atmospheric Environment* **2008**, *42* (7), 1371-1388.  
358 49. Tröstl, J.; Chuang, W. K.; Gordon, H.; Heinritzi, M.; Yan, C.; Molteni, U.; Ahlm, L.;  
359 Frege, C.; Bianchi, F.; Wagner, R., et al., The role of low-volatility organic compounds in initial  
360 particle growth in the atmosphere. *Nature* **2016**, *533* (7604), 527-531.  
361 50. Jimenez, J. L.; Canagaratna, M. R.; Donahue, N. M.; Prevot, A. S. H.; Zhang, Q.; Kroll,  
362 J. H.; DeCarlo, P. F.; Allan, J. D.; Coe, H.; Ng, N. L., et al., Evolution of Organic Aerosols in  
363 the Atmosphere. *Science* **2009**, *326* (5959), 1525-1529.  
364 51. Alfarra, M. R.; Coe, H.; Allan, J. D.; Bower, K. N.; Boudries, H.; Canagaratna, M. R.;  
365 Jimenez, J. L.; Jayne, J. T.; Garforth, A. A.; Li, S.-M., et al., Characterization of urban and rural  
366 organic particulate in the Lower Fraser Valley using two Aerodyne Aerosol Mass Spectrometers.  
367 *Atmospheric Environment* **2004**, *38* (34), 5745-5758.  
368 52. Duplissy, J.; DeCarlo, P. F.; Dommen, J.; Alfarra, M. R.; Metzger, A.; Barmpadimos,  
369 I.; Prevot, A. S. H.; Weingartner, E.; Tritscher, T.; Gysel, M., et al., Relating hygroscopicity and  
370 composition of organic aerosol particulate matter. *Atmos. Chem. Phys.* **2011**, *11* (3), 1155-1165.  
371 53. Marcolli, C.; Canagaratna, M. R.; Worsnop, D. R.; Bahreini, R.; de Gouw, J. A.;  
372 Warneke, C.; Goldan, P. D.; Kuster, W. C.; Williams, E. J.; Lerner, B. M., et al., Cluster Analysis  
373 of the Organic Peaks in Bulk Mass Spectra Obtained During the 2002 New England Air Quality  
374 Study with an Aerodyne Aerosol Mass Spectrometer. *Atmos. Chem. Phys.* **2006**, *6* (12), 5649-5666.  
375 54. Aiken, A. C.; DeCarlo, P. F.; Jimenez, J. L., Elemental Analysis of Organic Species with  
376 Electron Ionization High-Resolution Mass Spectrometry. *Analytical Chemistry* **2007**, *79* (21),  
377 8350-8358.  
378 55. Pankow, J. F.; Asher, W. E., SIMPOL.1: a simple group contribution method for predicting  
379 vapor pressures and enthalpies of vaporization of multifunctional organic compounds. *Atmos.*  
380 *Chem. Phys.* **2008**, *8* (10), 2773-2796.  
381 56. Farmer, D. K.; Matsunaga, A.; Docherty, K. S.; Surratt, J. D.; Seinfeld, J. H.; Ziemann,  
382 P. J.; Jimenez, J. L., Response of an aerosol mass spectrometer to organonitrates and  
383 organosulfates and implications for atmospheric chemistry. *Proceedings of the National Academy*  
384 *of Sciences* **2010**, *107* (15), 6670-6675.  
385 57. Xu, L.; Suresh, S.; Guo, H.; Weber, R. J.; Ng, N. L., Aerosol characterization over the  
386 southeastern United States using high-resolution aerosol mass spectrometry: spatial and seasonal  
387 variation of aerosol composition and sources with a focus on organic nitrates. *Atmos. Chem. Phys.*  
388 **2015**, *15* (13), 7307-7336.  
389 58. Ng, N. L.; Brown, S. S.; Archibald, A. T.; Atlas, E.; Cohen, R. C.; Crowley, J. N.; Day,  
390 D. A.; Donahue, N. M.; Fry, J. L.; Fuchs, H., et al., Nitrate radicals and biogenic volatile organic  
391 compounds: oxidation, mechanisms, and organic aerosol. *Atmos. Chem. Phys.* **2017**, *17* (3), 2103-  
392 2162.  
393 59. Boyd, C.; Sanchez, J.; Xu, L.; Eugene, A. J.; Nah, T.; Tuet, W.; Guzman, M. I.; Ng, N.,  
394 Secondary organic aerosol formation from the  $\beta$ -pinene+ NO<sub>3</sub> system: effect of humidity and  
395 peroxy radical fate. *Atmospheric Chemistry and Physics* **2015**, *15* (13), 7497-7522.  
396 60. Bruns, E. A.; Perraud, V. r.; Zelenyuk, A.; Ezell, M. J.; Johnson, S. N.; Yu, Y.; Imre,  
397 D.; Finlayson-Pitts, B. J.; Alexander, M. L., Comparison of FTIR and particle mass spectrometry

398 for the measurement of particulate organic nitrates. *Environmental science & technology* **2010**, *44*  
399 (3), 1056-1061.

400 61. Fry, J.; Kiendler-Scharr, A.; Rollins, A.; Wooldridge, P.; Brown, S.; Fuchs, H.; Dubé,  
401 W.; Mensah, A.; Maso, M. d.; Tillmann, R., Organic nitrate and secondary organic aerosol yield  
402 from NO<sub>3</sub> oxidation of  $\beta$ -pinene evaluated using a gas-phase kinetics/aerosol partitioning model.  
403 *Atmospheric Chemistry and Physics* **2009**, *9* (4), 1431-1449.

404 62. Chen, Y.; Xu, L.; Humphry, T.; Hettiyadura, A. P. S.; Ovadnevaite, J.; Huang, S.;  
405 Poulain, L.; Schroder, J. C.; Campuzano-Jost, P.; Jimenez, J. L., et al., Response of the Aerodyne  
406 Aerosol Mass Spectrometer to Inorganic Sulfates and Organosulfur Compounds: Applications in  
407 Field and Laboratory Measurements. *Environmental Science & Technology* **2019**, *53* (9), 5176-  
408 5186.

409 63. Mattila, J. M.; Arata, C.; Wang, C.; Katz, E. F.; Abeleira, A.; Zhou, Y.; Zhou, S.;  
410 Goldstein, A. H.; Abbatt, J. P. D.; DeCarlo, P. F., et al., Dark Chemistry during Bleach Cleaning  
411 Enhances Oxidation of Organics and Secondary Organic Aerosol Production Indoors.  
412 *Environmental Science & Technology Letters* **2020**, *7* (11), 795-801.

413 64. Mattila, J. M.; Lakey, P. S. J.; Shiraiwa, M.; Wang, C.; Abbatt, J. P. D.; Arata, C.;  
414 Goldstein, A. H.; Ampollini, L.; Katz, E. F.; DeCarlo, P. F., et al., Multiphase Chemistry Controls  
415 Inorganic Chlorinated and Nitrogenated Compounds in Indoor Air during Bleach Cleaning.  
416 *Environmental Science & Technology* **2020**, *54* (3), 1730-1739.

417 65. Weschler, C. J., Changes in indoor pollutants since the 1950s. *Atmospheric Environment*  
418 **2009**, *43* (1), 153-169.

419 66. Singer, B. C.; Coleman, B. K.; Destailats, H.; Hodgson, A. T.; Lunden, M. M.; Weschler,  
420 C. J.; Nazaroff, W. W., Indoor secondary pollutants from cleaning product and air freshener use  
421 in the presence of ozone. *Atmospheric Environment* **2006**, *40* (35), 6696-6710.

422 67. Anderson, J. O.; Thundiyil, J. G.; Stolbach, A., Clearing the Air: A Review of the Effects  
423 of Particulate Matter Air Pollution on Human Health. *Journal of Medical Toxicology* **2012**, *8* (2),  
424 166-175.

425 68. Li, N.; Xia, T.; Nel, A. E., The role of oxidative stress in ambient particulate matter-  
426 induced lung diseases and its implications in the toxicity of engineered nanoparticles. *Free Radical*  
427 *Biology and Medicine* **2008**, *44* (9), 1689-1699.

428 69. Gaschen, A.; Lang, D.; Kalberer, M.; Savi, M.; Geiser, T.; Gazdhar, A.; Lehr, C.-M.;  
429 Bur, M.; Dommen, J.; Baltensperger, U., et al., Cellular Responses after Exposure of Lung Cell  
430 Cultures to Secondary Organic Aerosol Particles. *Environmental Science & Technology* **2010**, *44*  
431 (4), 1424-1430.

432 70. Gonzalez-Rivera, J. C.; Baldrige, K. C.; Wang, D. S.; Patel, K.; Chuvalo-Abraham, J.  
433 C. L.; Hildebrandt Ruiz, L.; Contreras, L. M., Post-transcriptional air pollution oxidation to the  
434 cholesterol biosynthesis pathway promotes pulmonary stress phenotypes. *Communications*  
435 *Biology* **2020**, *3* (1), 392.

436 71. Fushimi, A.; Nakajima, D.; Furuyama, A.; Suzuki, G.; Ito, T.; Sato, K.; Fujitani, Y.;  
437 Kondo, Y.; Yoshino, A.; Ramasamy, S., et al., Source contributions to multiple toxic potentials  
438 of atmospheric organic aerosols. *Science of The Total Environment* **2021**, *773*, 145614.

439 72. Tuet, W. Y.; Chen, Y.; Fok, S.; Gao, D.; Weber, R. J.; Champion, J. A.; Ng, N. L.,  
440 Chemical and cellular oxidant production induced by naphthalene secondary organic aerosol  
441 (SOA): effect of redox-active metals and photochemical aging. *Scientific Reports* **2017**, *7* (1),  
442 15157.

443

444 Figures

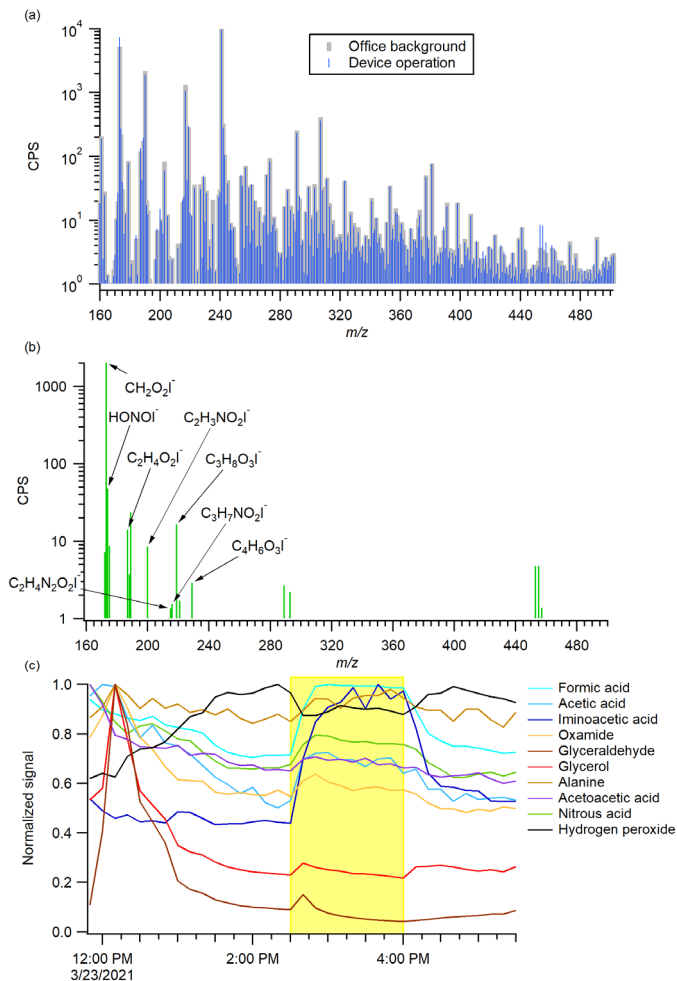

445  
 446 Figure 1. HR-ToF-CIMS results showing (a) grey: office background mass spectrum / blue: mass spectrum during  
 447 hydroxyl generator operation, (b) the mass spectrum difference between before and during the operation of hydroxyl  
 448 generator, and (c) time evolution of selected species. The data are 10-min averaged data and are normalized by the  
 449 maximum signal of each species. The hydroxyl generator was in operation from 2:30 pm to 4:00 pm (highlighted in  
 450 yellow). Glyceraldehyde ( $m/z$  217,  $\text{C}_3\text{H}_6\text{O}_3\text{I}^-$ ) is not included in the mass spectrum in (b) due to its rapid decay after  
 451 the formation.



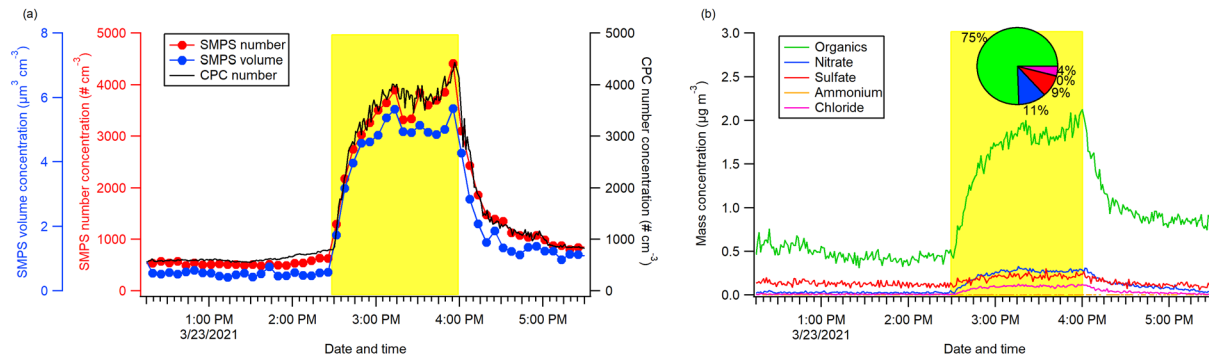

452

453 Figure 2. Time series of (a) particle number (CPC and SMPS) and volume concentrations (SMPS) and (b) non-  
 454 refractory species concentrations (HR-ToF-AMS). The mass fraction of different non-refractory species during the  
 455 hydroxyl generator operation is shown in the pie chart. The hydroxyl generator was in operation from 2:30 pm to 4:00  
 456 pm (highlighted in yellow).

457

458

459

460

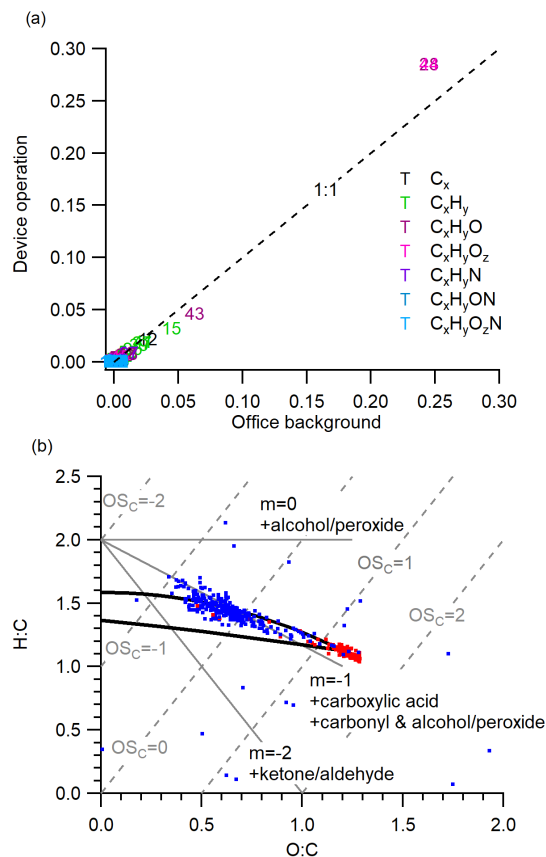

461  
 462 Figure 3. HR-ToF-AMS results showing (a) organic mass spectra comparison between during device operation and  
 463 office background and (b) VK-triangle diagram of organics. The black lines encompass the triangular space occupied  
 464 by ambient SOA.<sup>44</sup> The carbon oxidation states (OS<sub>C</sub>) are shown with grey dotted lines. The blue data points  
 465 correspond to office background and the red data points correspond to device operation.  
 466  
 467

468 For TOC only

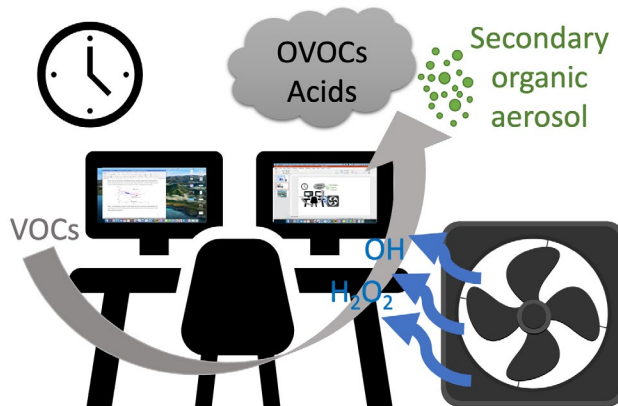

469
