# Supplementary material for: Formation of oxidized gases and secondary organic aerosol from a commercial oxidant-generating electronic air cleaner
Source: bioRxiv or medRxiv preprint supplement (doi:10.1101/2021.06.01.21258186), 2021-06-04
Supplement: Supplementary file [file media-1.pdf]

Supporting information for

## **Formation of oxidized gases and secondary organic aerosol from a commercial oxidant-generating electronic air cleaner**

Taekyu Joo<sup>a</sup>, Jean C. Rivera-Rios<sup>b</sup>, Daniel Alvarado-Velez<sup>b</sup>, Sabrina Westgate<sup>b</sup>, Nga Lee Ng<sup>a,b,c</sup>

5 *<sup>a</sup>School of Earth and Atmospheric Sciences, Georgia Institute of Technology, Atlanta, Georgia 30332, United States*

*<sup>b</sup>School of Chemical and Biomolecular Engineering, Georgia Institute of Technology, Atlanta, Georgia 30332, United States*

*<sup>c</sup>School of Civil and Environmental Engineering, Georgia Institute of Technology, Atlanta, Georgia 30332, United States*

10

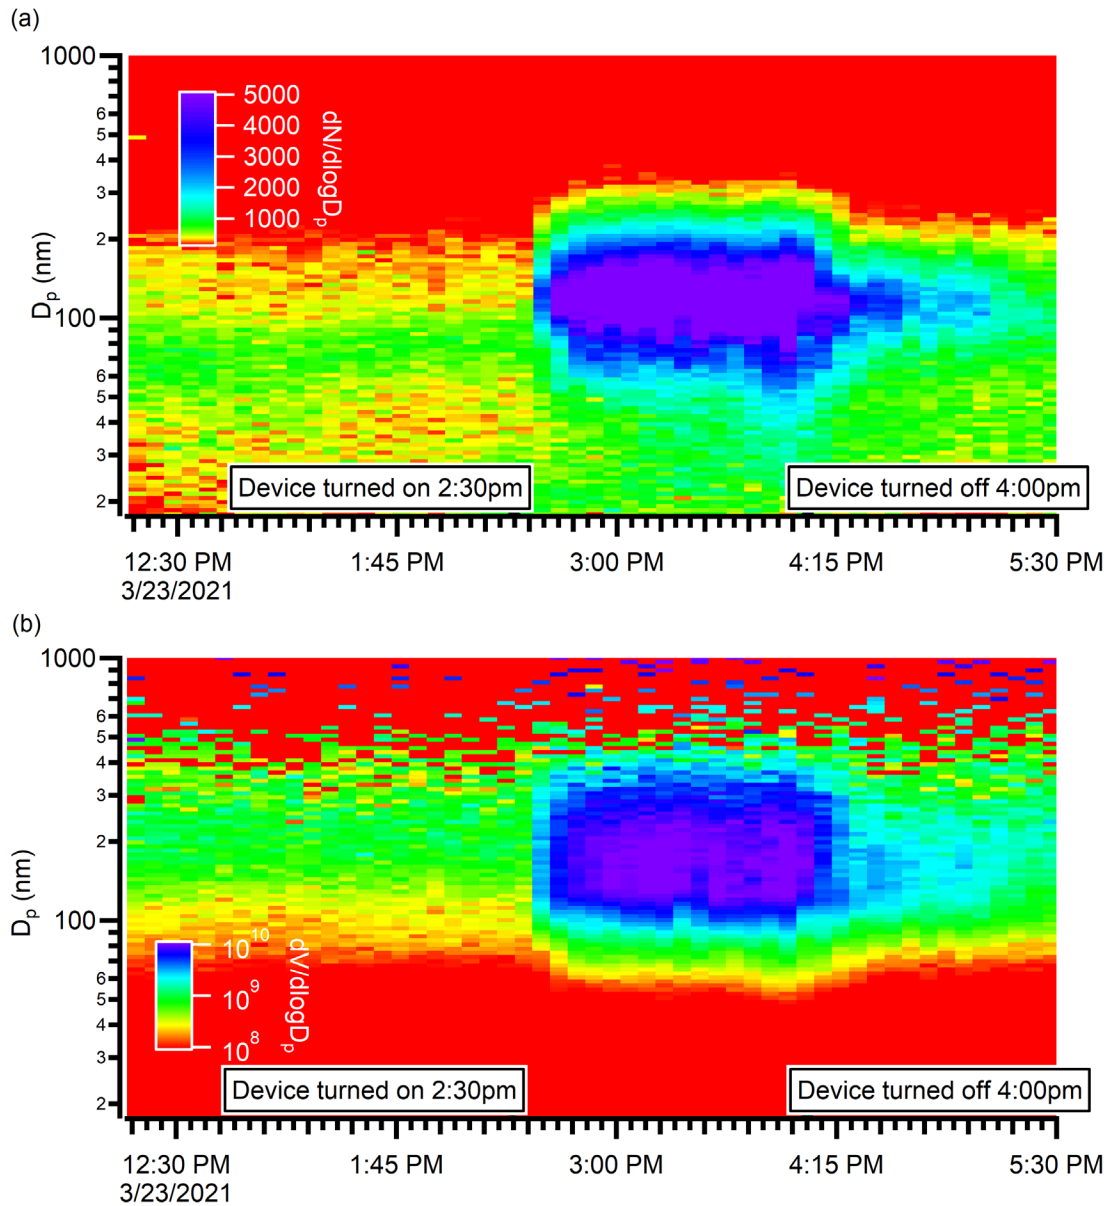

15 Figure S1. Size distribution of (a) particle number concentration ( $\# \text{ cm}^{-3}$ ) and (b) particle volume concentration ( $\text{nm}^3 \text{ cm}^{-3}$ ) from the office measurements. The color scale is in log scale.

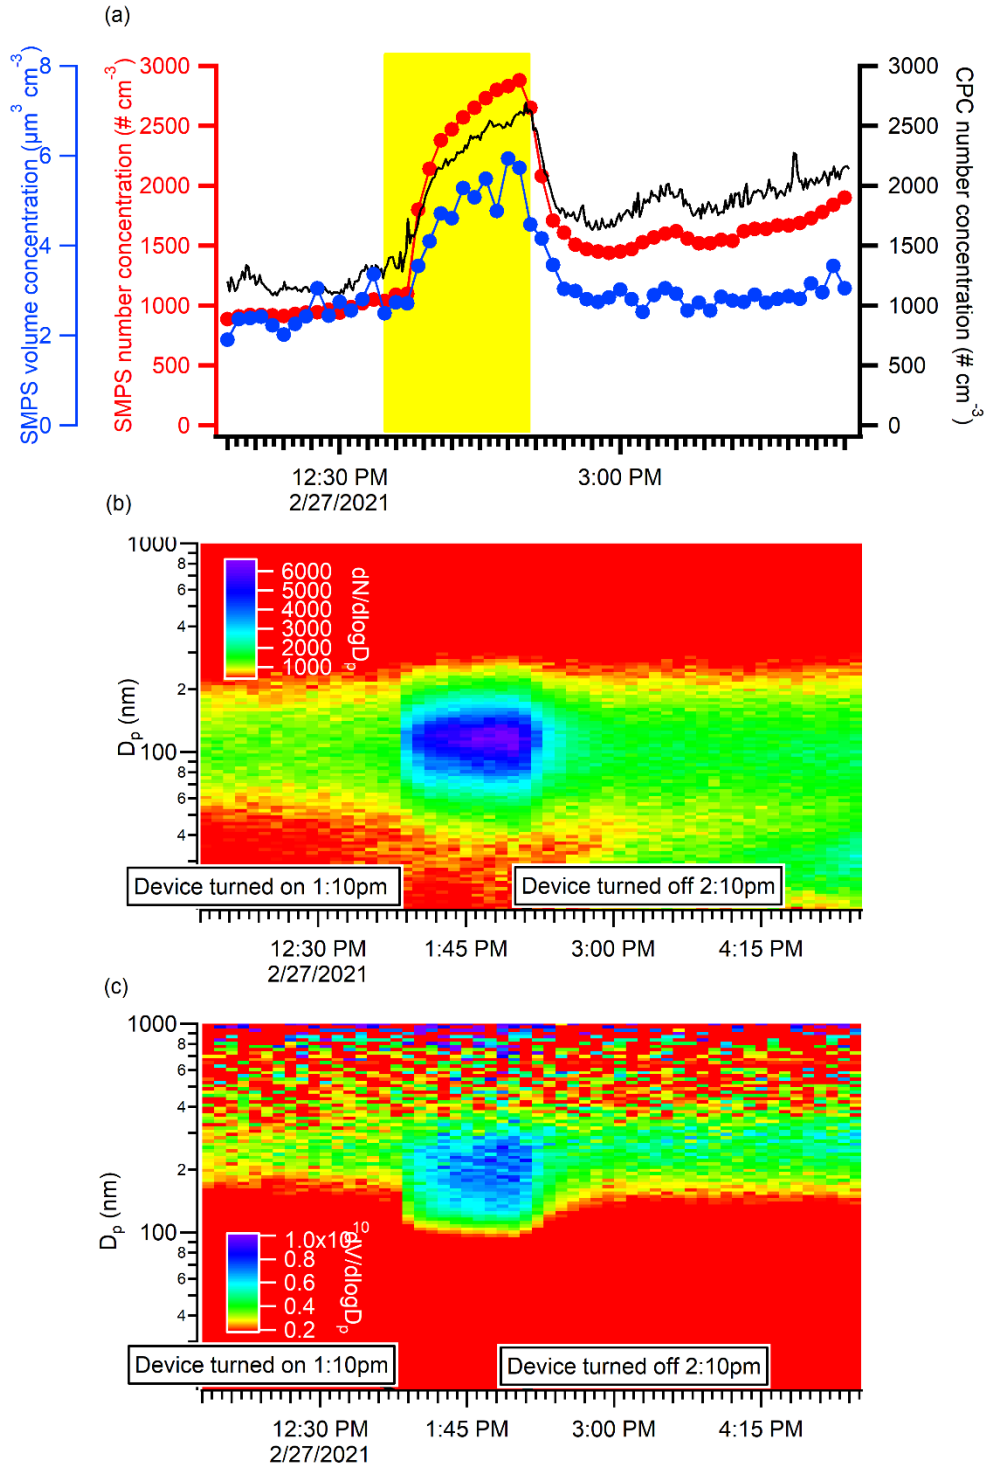

20 Figure S2. SMPS and CPC results from an experiment performed in a larger space (laboratory) than the office: (a) time series of number (CPC and SMPS) and volume concentrations (SMPS) with device operation period highlighted in yellow. Size distribution of (b) particle number concentration ( $\# \text{cm}^{-3}$ ) and (c) particle volume concentration ( $\text{nm}^3 \text{cm}^{-3}$ ). The color scale is in log scale.

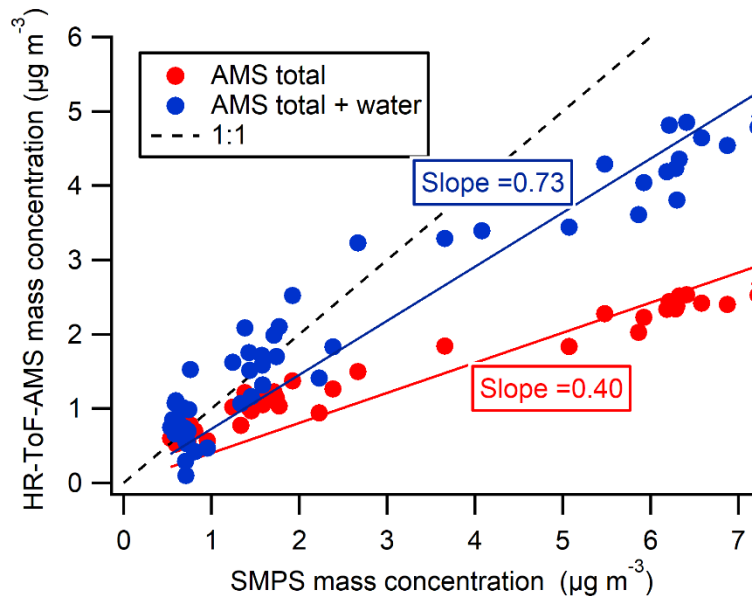

25 Figure S3. Comparison of AMS total mass concentration (sum of all non-refractory species) and SMPS mass concentration (intercepts set to zero) from the office measurements. The SMPS volume concentration was converted into mass concentration using density of the individual species:  $1.75 \text{ g/cm}^3$  for sulfate, nitrate, and ammonium;  $1.52 \text{ g/cm}^3$  for chloride;  $1.79 \text{ g cm}^{-3}$  for organics, estimated based on the elemental ratio of organics.<sup>1</sup> Particle water from AMS was estimated based on the equation proposed in Engelhart et al.<sup>2</sup>

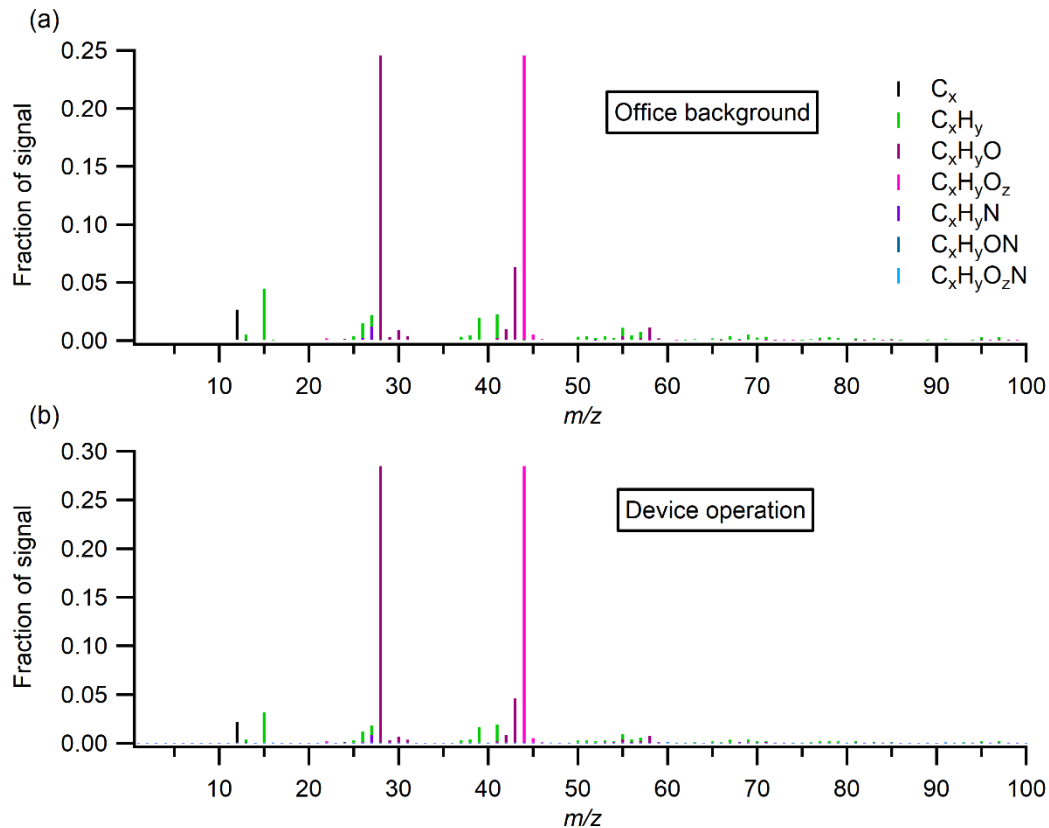

30 Figure S4. Organic families mass spectra of (a) office background and (b) during device operation.

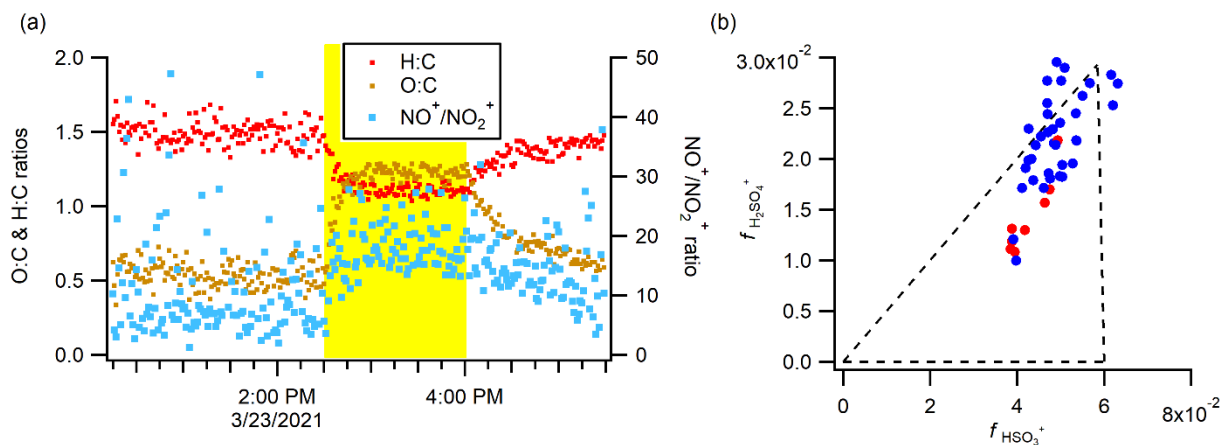

35 Figure S5. (a) Time series of H:C, O:C, and  $NO^+/NO_2^+$  ratio from the office measurements, with the device operation period highlighted in yellow. (b)  $f_{H_2SO_4^+}$  vs.  $f_{HSO_3^+}$  during the experiment.  $f_{H_2SO_4^+}$  and  $f_{HSO_3^+}$  are the fractions of  $H_2SO_4^+$  and  $HSO_3^+$  in  $H_xSO_y^+$  fragments ( $SO^+$ ,  $SO_2^+$ ,  $SO_3^+$ ,  $HSO_3^+$ , and  $H_2SO_4^+$ ), respectively. Both fractions approach zero when organic sulfate contribution to total sulfate increases.<sup>3</sup> Data are 10-min averaged data. The blue data points correspond to office background and the red data points correspond to device operation. The two blue data points at around [0.04, 0.01] are the data points immediately after the device was turned off.

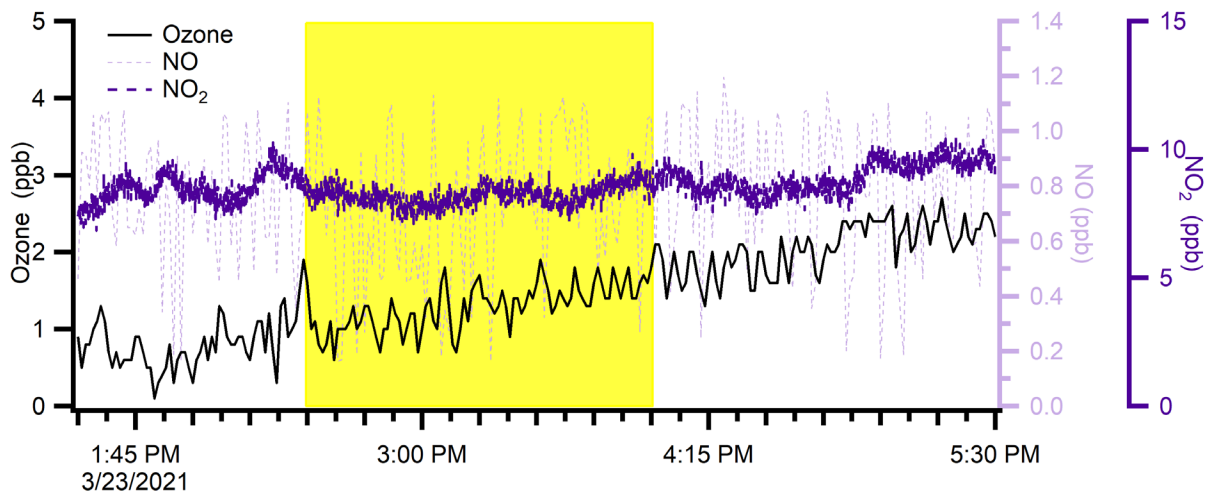

40

Figure S6. Time series of ozone, NO, and NO<sub>2</sub> from the office measurements. The device was in operation from 2:30 pm to 4:00 pm (highlighted in yellow).

#### 45 Reference

1. Kuwata, M.; Zorn, S. R.; Martin, S. T., Using Elemental Ratios to Predict the Density of Organic Material Composed of Carbon, Hydrogen, and Oxygen. *Environmental Science & Technology* **2012**, *46* (2), 787-794.
2. Engelhart, G. J.; Hildebrandt, L.; Kostenidou, E.; Mihalopoulos, N.; Donahue, N. M.; Pandis, S. N., Water content of aged aerosol. *Atmos. Chem. Phys.* **2011**, *11* (3), 911-920.
3. Chen, Y.; Xu, L.; Humphry, T.; Hettiyadura, A. P. S.; Ovadnevaite, J.; Huang, S.; Poulain, L.; Schroder, J. C.; Campuzano-Jost, P.; Jimenez, J. L., et al., Response of the Aerodyne Aerosol Mass Spectrometer to Inorganic Sulfates and Organosulfur Compounds: Applications in Field and Laboratory Measurements. *Environmental Science & Technology* **2019**, *53* (9), 5176-5186.

55
